# Supplementary material for: Response certainty during bimanual movements reduces gamma oscillations in primary motor cortex
Source: PubMed Central journal article supplement (PMC7994913; doi:10.1016/j.neuroimage.2020.117448), 2020-10-12
Supplement: NIHMS1658697-supplement-1.pdf [file NIHMS1658697-supplement-1.pdf]

Supplementary Materials

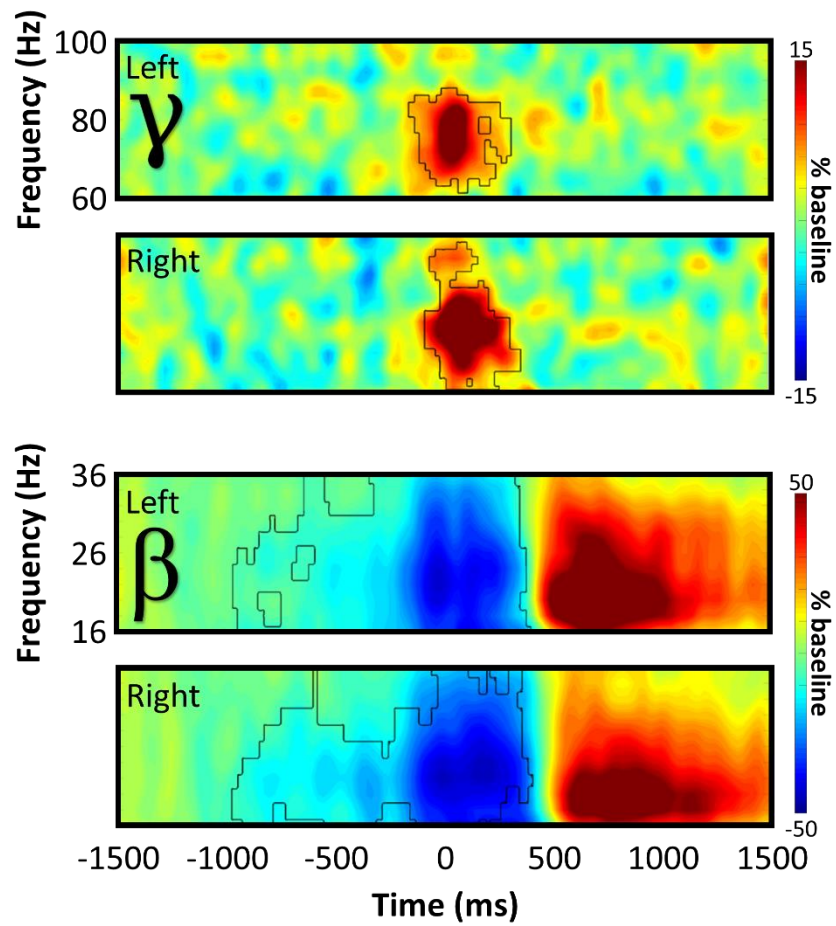

**Figure S1.** Time-frequency definitions of significant clusters identified in the sensor-level permutation testing.
